# Supplementary material for: A dendritic Sb2Se3/In2S3heterojunction nanorod array photocathode decorated with a MoSxcatalyst for efficient solar hydrogen evolution
Source: Royal Society of Chemistry journal article supplement (doi:10.1039/d0ta08874a), 2020-01-01
Supplement: d0ta08874a1.pdf [file d0ta08874a1.pdf]

## Supporting Information

### Dendritic Sb<sub>2</sub>Se<sub>3</sub>/In<sub>2</sub>S<sub>3</sub> Heterojunction Nanorod Arrays Photocathode Decorated with MoS<sub>x</sub> Catalyst for Efficient Solar Hydrogen Evolution

*Chang Liu,<sup>†a</sup> Tao Liu,<sup>†b</sup> Yingzheng Li,<sup>a</sup> Ziqi Zhao,<sup>a</sup> Dinghua Zhou,<sup>a</sup> Wenlong Li,<sup>a</sup> Yilong Zhao,<sup>a</sup> Hao Yang,<sup>c</sup> Licheng Sun,<sup>a,c,d</sup> Fusheng Li,<sup>\*a</sup> and Zhiqiang Li<sup>\*b</sup>*

a) State Key Laboratory of Fine Chemicals, Institute of Artificial Photosynthesis, DUT-KTH Joint Education and Research Centre on Molecular Devices, Institute for Energy Science and Technology, Dalian University of Technology, 116024 Dalian, China. *fusheng@dlut.edu.cn*

b) National-Local Joint Engineering Laboratory of New Energy Photoelectric Devices, College of Physics Science and Technology, Hebei University, 071002 Baoding, China. *lizhiqiang@hbu.edu.cn*

c) Department of Chemistry, School of Engineering Sciences in Chemistry, Biotechnology and Health, KTH Royal Institute of Technology, Stockholm 10044, Sweden.

d) Center of Artificial Photosynthesis for Solar Fuels, School of Science, Westlake University, 310024 Hangzhou, China.

<sup>†</sup>These authors contributed equally to this work.

**Instruments.** The surface morphology of the fabricated films was characterized by field emission scan electron microscopy (FE-SEM, HITACHI SU8220, operate at 5 kV). The surface compositions and the band diagrams of the electrode films were investigated using X-ray photoelectron spectroscopy (XPS) and (ultraviolet photoelectron spectroscopy (UPS) on an ESCALAB Xi<sup>+</sup> (Thermo Scientific™), and the crystal structures were characterized by X-ray diffraction (XRD) with Cu K $\alpha$  (1.54056 Å) radiation (SmartLab 9KW). The chemical structure of the films was studied using Raman spectroscopy at room temperature (LabRAM HR800, 532 nm excitation wavelength; HORIBA JobinYvon).

**Materials.** Molybdenum (Mo, 99.99%), antimony selenide (Sb<sub>2</sub>Se<sub>3</sub>, 99.99%) and selenium (Se powder, 99.99%) were purchased from Zhongnuo, Beijing, China. Thioacetamide (C<sub>2</sub>H<sub>5</sub>NS, 99%) and Citric acid (C<sub>6</sub>H<sub>8</sub>O<sub>7</sub>, 99%) were purchased from Innochem Reagent, Beijing, China. Indium chloride (InCl<sub>3</sub>·4H<sub>2</sub>O, 99.99%), Ammonium thiomolybdate ((NH<sub>4</sub>)<sub>2</sub>MoS<sub>4</sub>, 99.95%) and Sodium perchlorate (NaClO<sub>4</sub>, 98%) were purchased from Aladdin Reagent, Shanghai, China. All the reagents were used as received without further treatment. All aqueous solutions were prepared with high-purity deionized water (Milli-Q, resistance 18 M $\Omega$  cm<sup>-1</sup>).

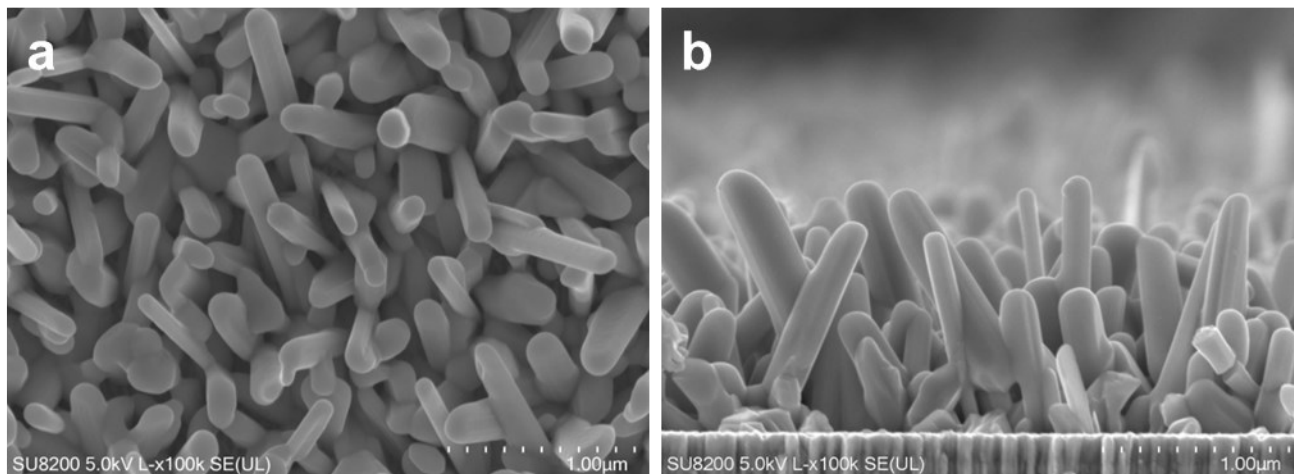

**Figure S1.** The top view (a) and cross view (b) SEM images of  $\text{Sb}_2\text{Se}_3$  film.

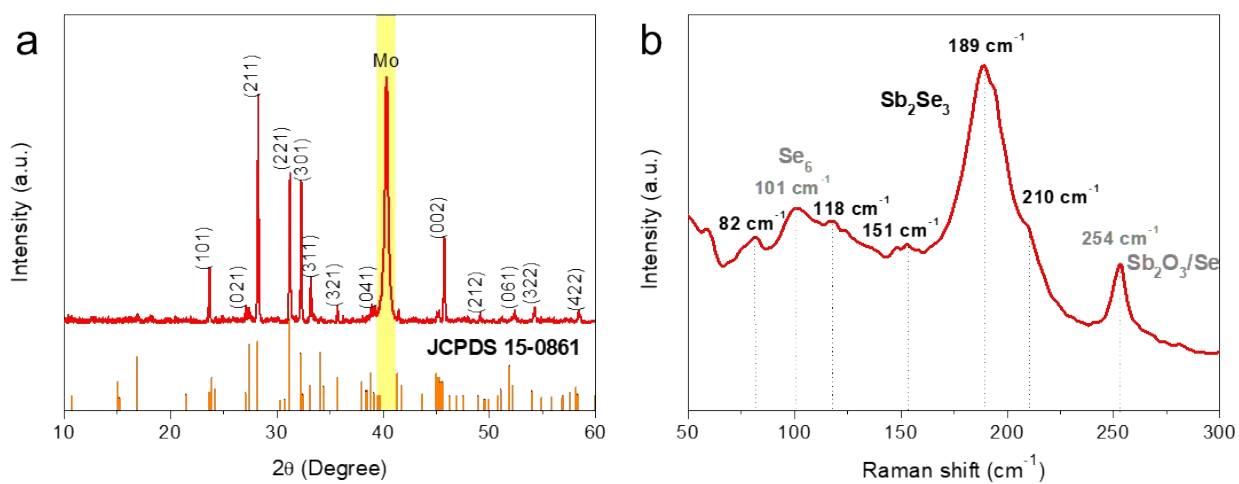

**Figure S2.** The XRD pattern (a) and Raman spectrum (b) of  $\text{Sb}_2\text{Se}_3$  film.

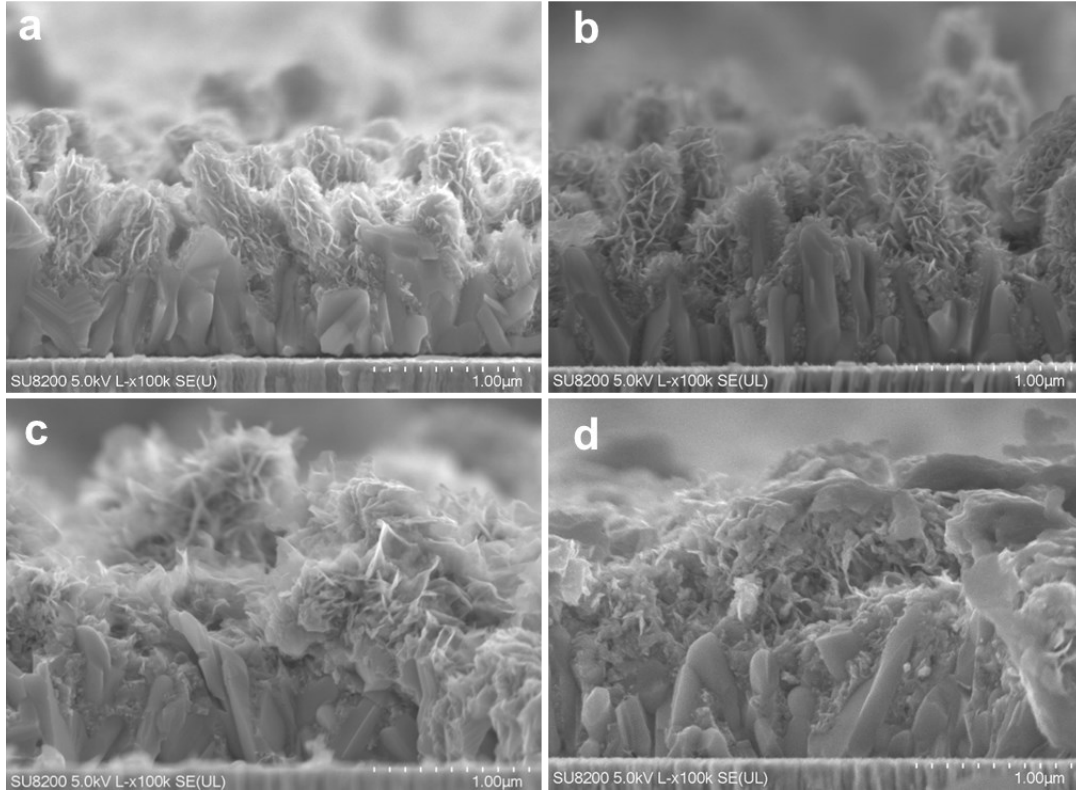

**Figure S3.** The cross-view SEM images of varying thickness  $\text{In}_2\text{S}_3$  film grown on  $\text{Sb}_2\text{Se}_3$ , (a)  $\text{Sb}_2\text{Se}_3/\text{In}_2\text{S}_3$ -1.5, (b)  $\text{Sb}_2\text{Se}_3/\text{In}_2\text{S}_3$ -2, (c)  $\text{Sb}_2\text{Se}_3/\text{In}_2\text{S}_3$ -3, (d)  $\text{Sb}_2\text{Se}_3/\text{In}_2\text{S}_3$ -4.

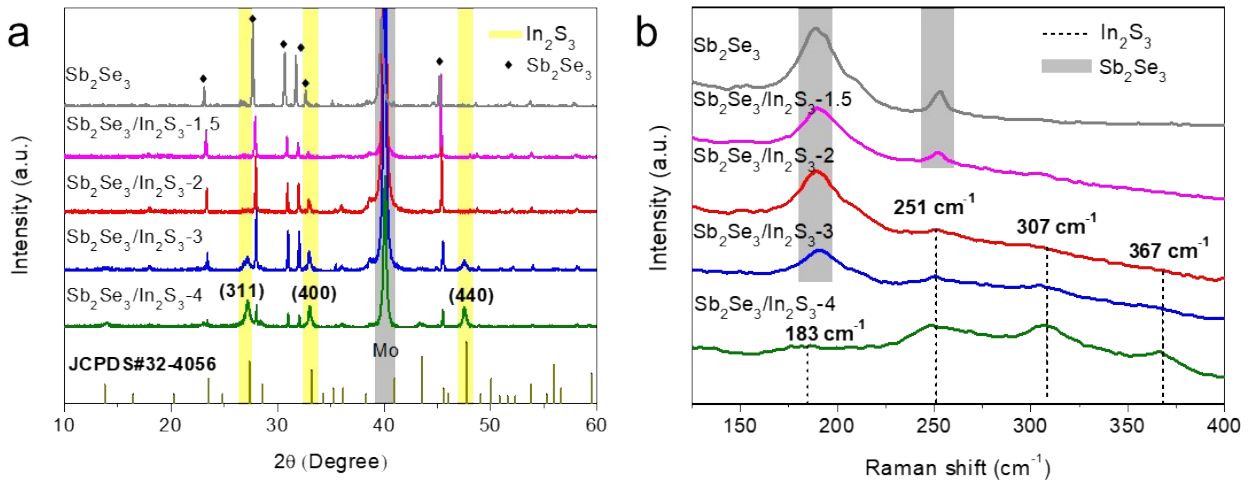

**Figure S4.** The XRD pattern (a) and Raman spectra (b) of  $\text{Sb}_2\text{Se}_3$ ,  $\text{Sb}_2\text{Se}_3/\text{In}_2\text{S}_3$ -1.5,  $\text{Sb}_2\text{Se}_3/\text{In}_2\text{S}_3$ -2,  $\text{Sb}_2\text{Se}_3/\text{In}_2\text{S}_3$ -3 and  $\text{Sb}_2\text{Se}_3/\text{In}_2\text{S}_3$ -4 films.

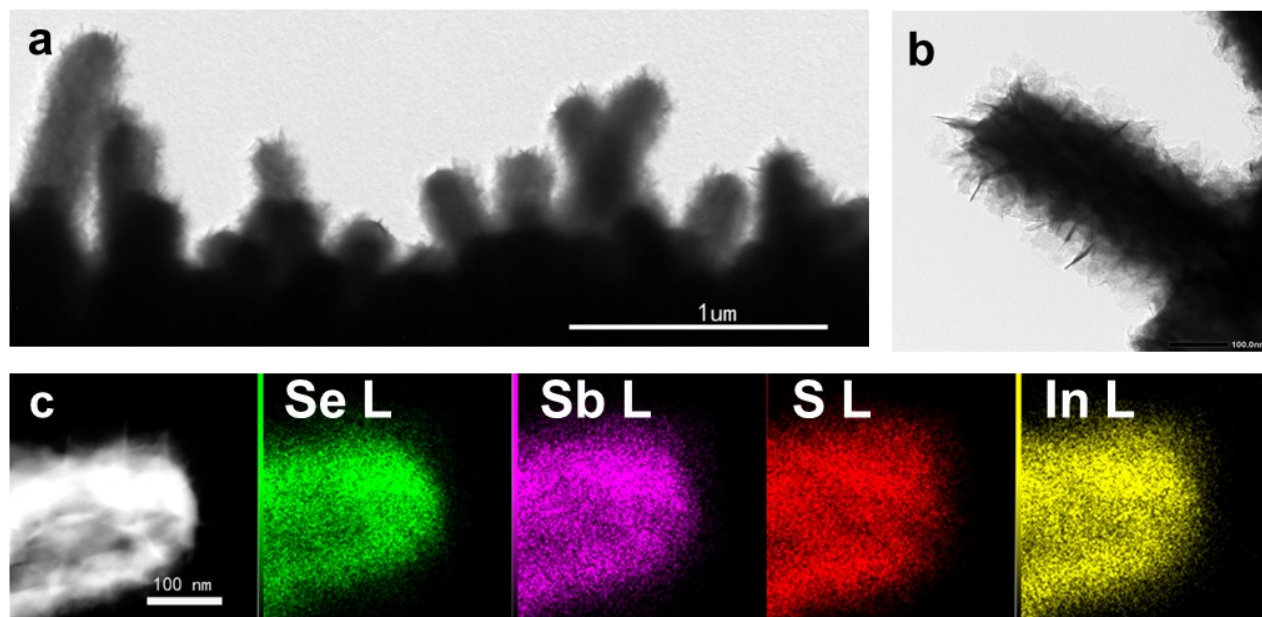

**Figure S5.** (a) and (b) the high-resolution transmission electron microscopy (HRTEM) images of  $\text{Sb}_2\text{Se}_3/\text{In}_2\text{S}_3$ -2 film, (c) the HAADF-STEM image and energy-dispersive spectroscopy elemental mapping of the  $\text{Sb}_2\text{Se}_3/\text{In}_2\text{S}_3$ -2 film. Elements detected: Se, Sb, S, and In, respectively.

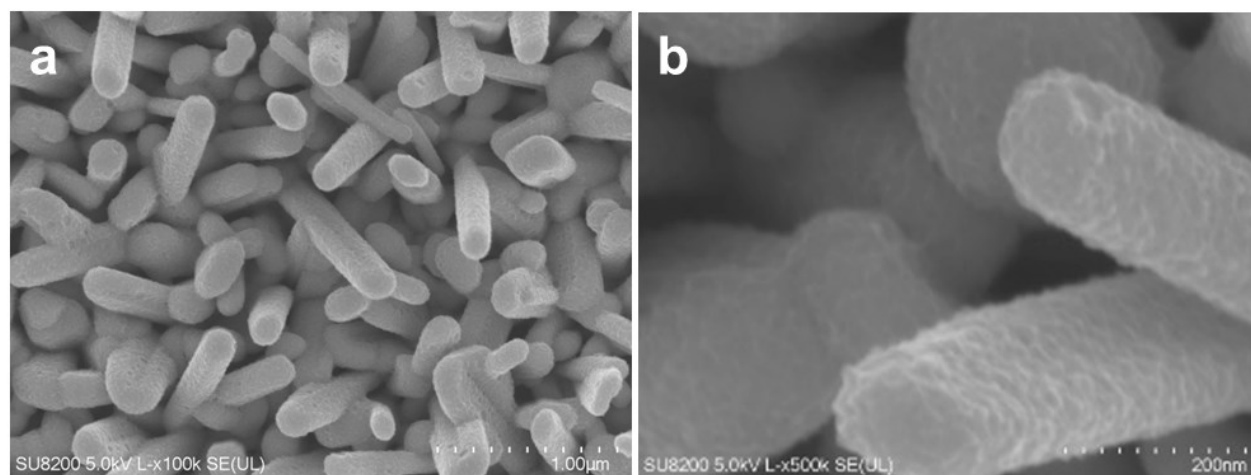

**Figure S6.** The surface SEM images of  $\text{Sb}_2\text{Se}_3/\text{MoS}_x$ .

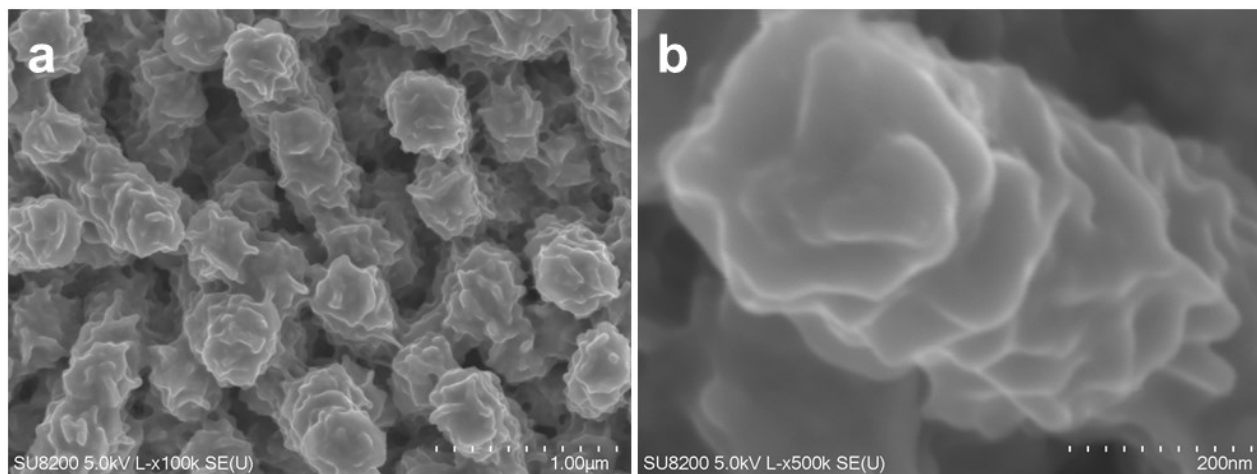

**Figure S7.** The surface SEM images of  $\text{Sb}_2\text{Se}_3/\text{In}_2\text{S}_3\text{-2}/\text{MoS}_x$ .

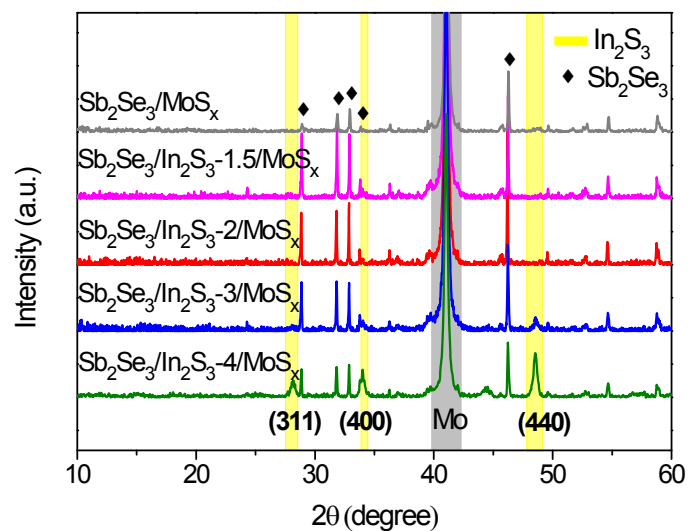

**Figure S8.** The XRD pattern of different  $\text{Sb}_2\text{Se}_3/\text{In}_2\text{S}_3/\text{MoS}_x$  and  $\text{Sb}_2\text{Se}_3/\text{MoS}_x$  films.

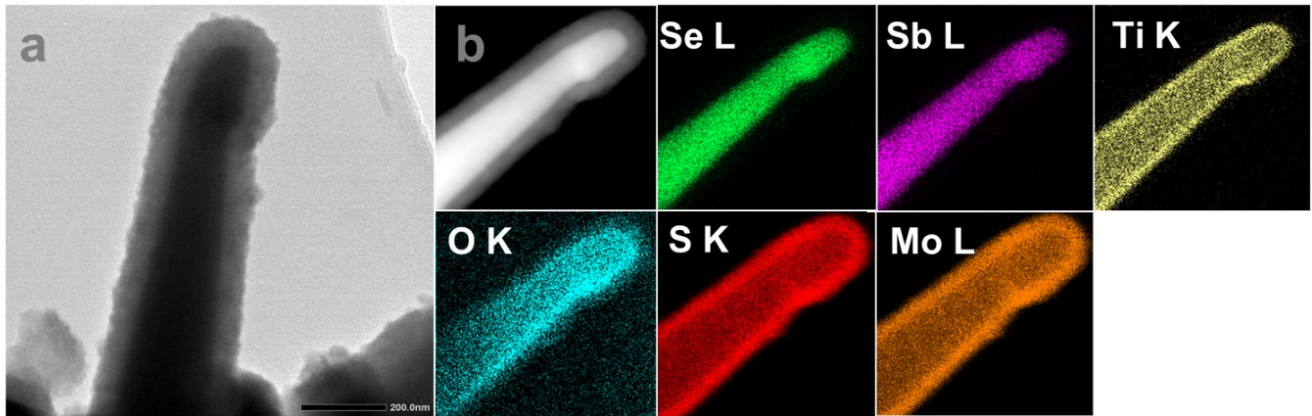

**Figure S9.** (a) the HRTEM image and (b) the HAADF-STEM and the corresponding EDS mapping images of the  $\text{Sb}_2\text{Se}_3/\text{MoS}_x$  films.

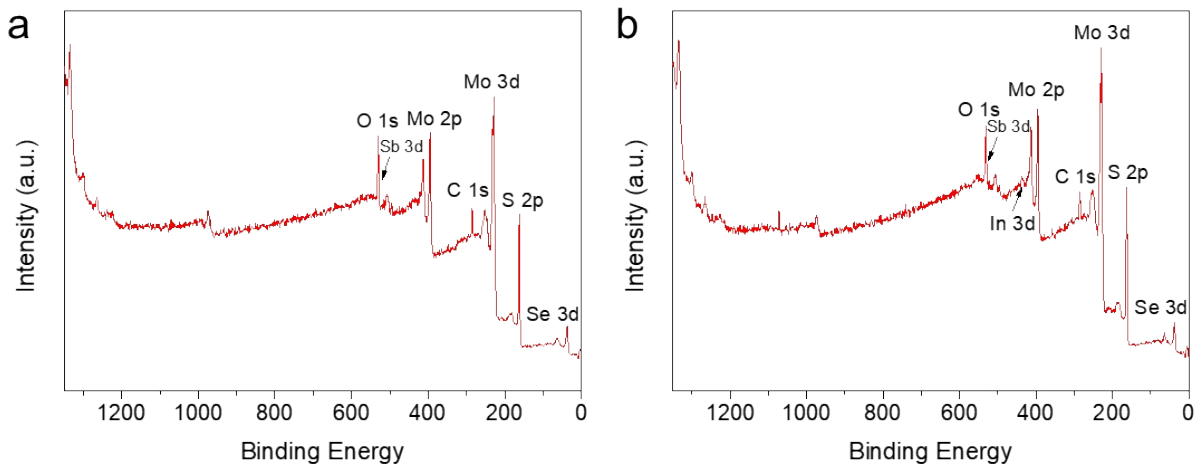

**Figure S10.** XPS survey spectra of (a)  $\text{Sb}_2\text{Se}_3/\text{MoS}_x$  film, (b)  $\text{Sb}_2\text{Se}_3/\text{In}_2\text{S}_3/\text{MoS}_x$  film.

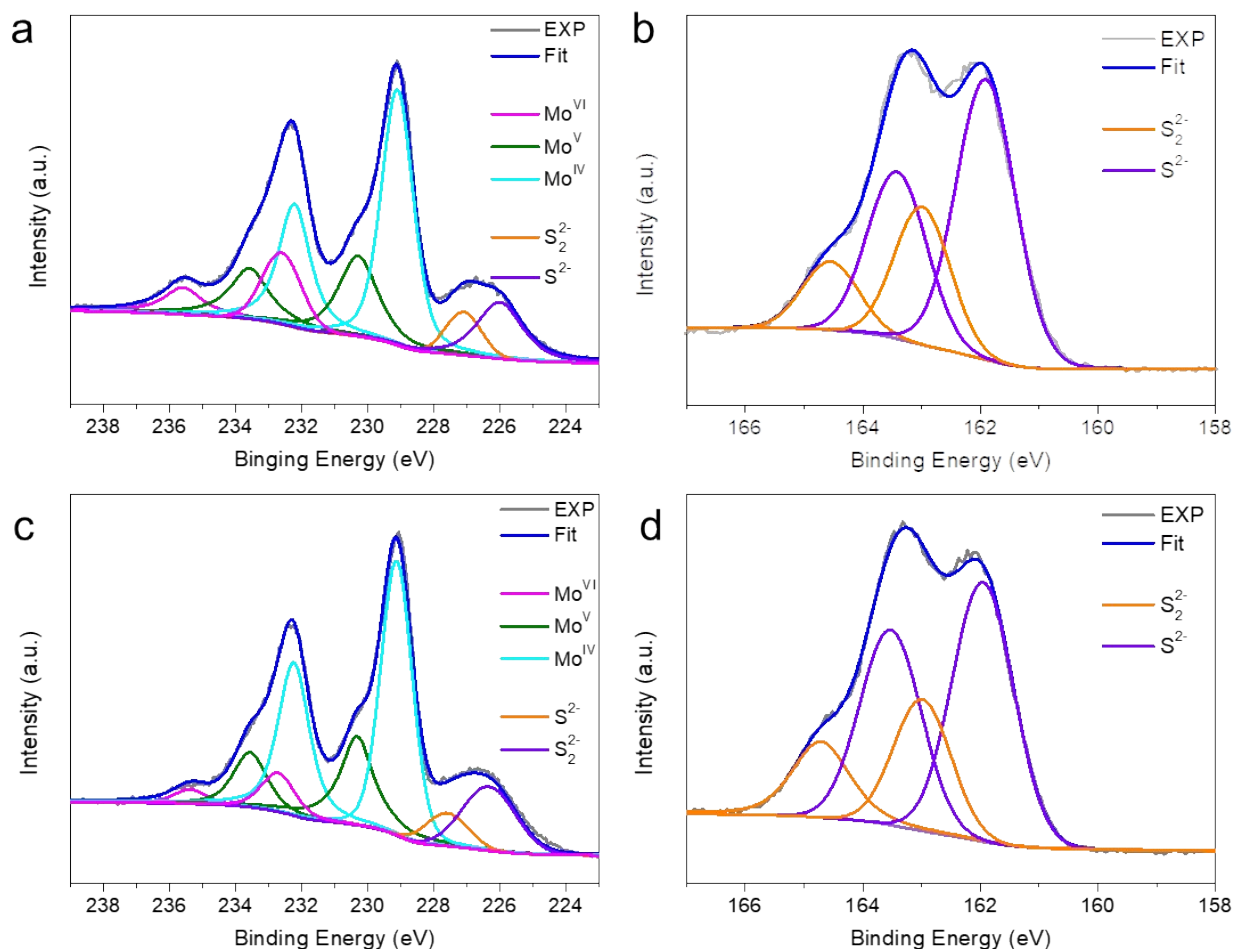

**Figure S11.** High-resolution XPS spectra of (a), (b)  $\text{Sb}_2\text{Se}_3/\text{MoS}_x$ , (c), (d)  $\text{Sb}_2\text{Se}_3/\text{In}_2\text{S}_3/\text{MoS}_x$ .

X-ray photoelectron spectra (XPS) fitting for the  $\text{MoS}_x$  catalysts on the surface of  $\text{Sb}_2\text{Se}_3$  and  $\text{Sb}_2\text{Se}_3/\text{In}_2\text{S}_3$  photocathode. (a), (c) In the Mo 3d and S 2s regions, the three doublets of Mo 3d are  $\text{Mo}^{\text{VI}}$ ,  $\text{Mo}^{\text{V}}$ , and  $\text{Mo}^{\text{IV}}$  states, represented by purple-, pink-, and orange-colored peaks, respectively. The two peaks of S 2s are  $\text{S}_2^{2-}$ , and  $\text{S}^{2-}$  states, represented by blue- and green-colored peaks, respectively. (b), (d) In the S 2p regions, the two doublets of S 2p are  $\text{S}_2^{2-}$ , and  $\text{S}^{2-}$  states and the doublet of sulfate, represented by blue, green- and dark red-colored peaks, respectively.



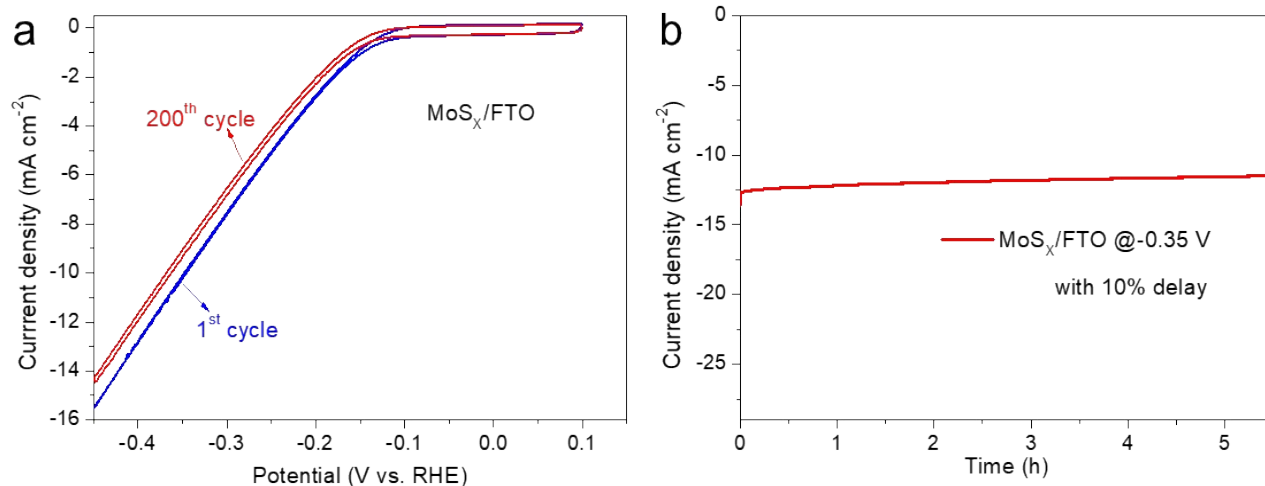

**Figure S12.** (a) The CV curves for MoS<sub>x</sub>/FTO in 0.1 M H<sub>2</sub>SO<sub>4</sub>. The sweep rate was 10 mV s<sup>-1</sup>. (b) I-t curve of MoS<sub>x</sub>/FTO at -0.35 V vs. RHE.

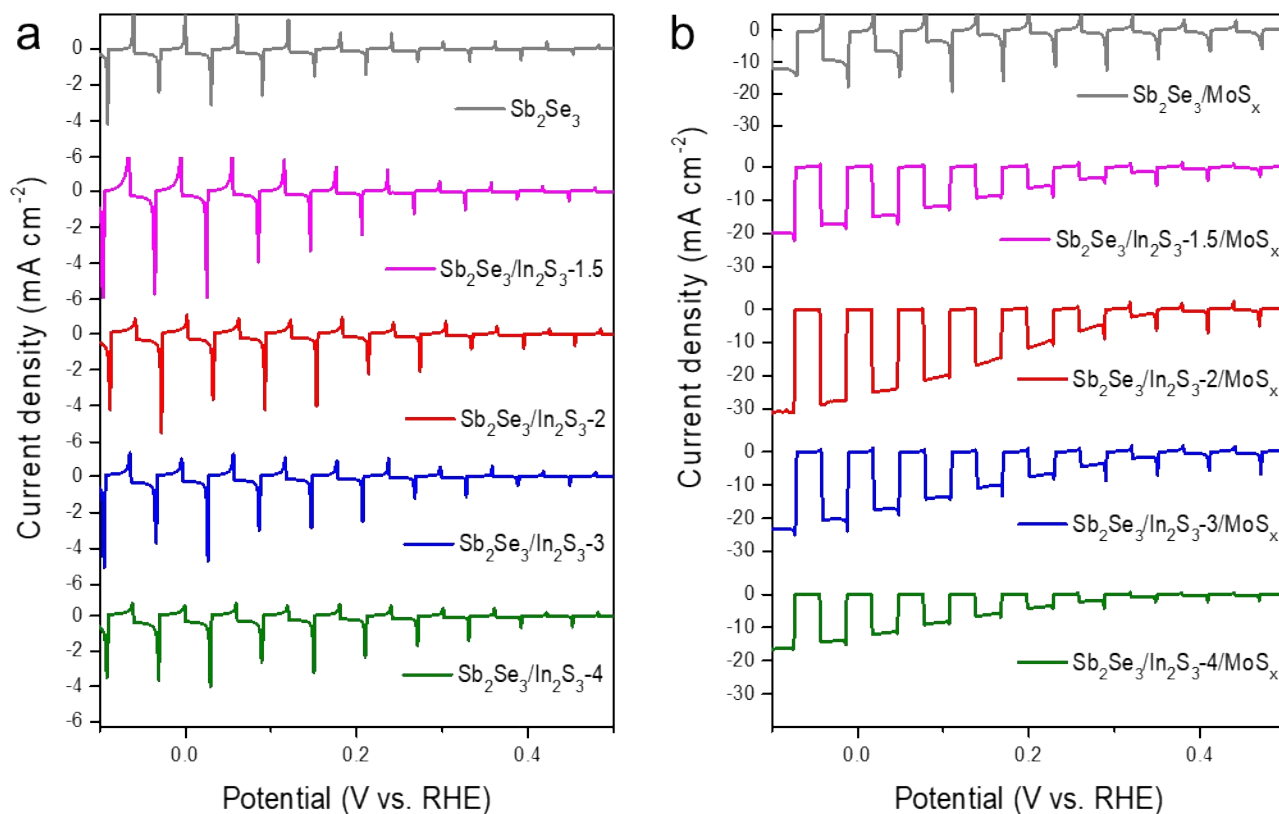

**Figure S13.** Current density-potential curves of (a) Sb<sub>2</sub>Se<sub>3</sub> and Sb<sub>2</sub>Se<sub>3</sub>/In<sub>2</sub>S<sub>3</sub> photocathodes, (b) Sb<sub>2</sub>Se<sub>3</sub>/MoS<sub>x</sub> and Sb<sub>2</sub>Se<sub>3</sub>/In<sub>2</sub>S<sub>3</sub>/MoS<sub>x</sub> photocathodes in a 0.1 M H<sub>2</sub>SO<sub>4</sub> electrolyte under chopped illumination (AM 1.5 G, 100 mW cm<sup>-2</sup>).

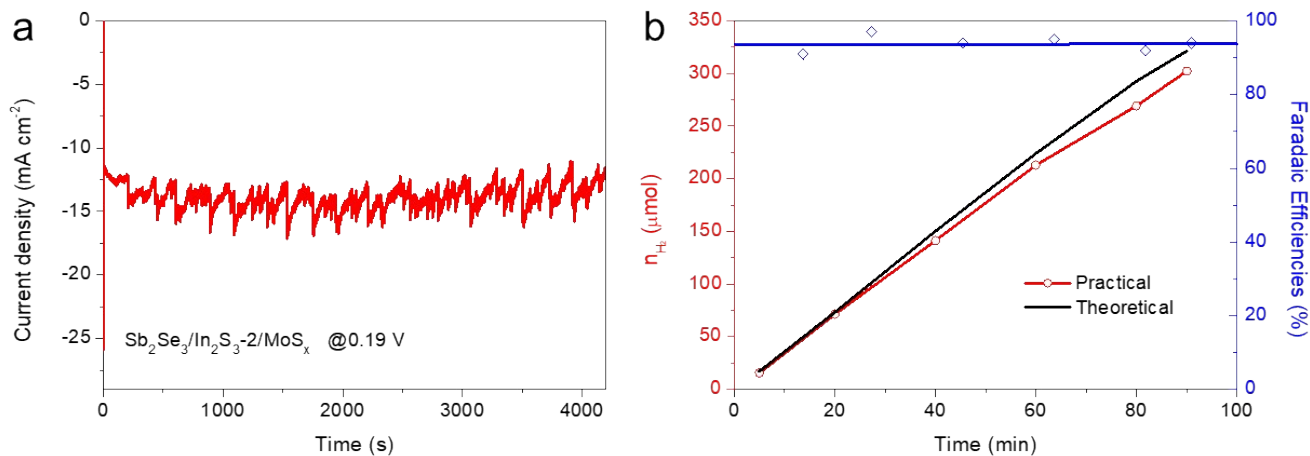

**Figure S14.** (a) *I-t* curve of  $\text{Sb}_2\text{Se}_3/\text{In}_2\text{S}_3\text{-2}/\text{MoS}_x$  photocathode at 0.19 V vs RHE under illumination (AM 1.5 G,  $100 \text{ mW cm}^{-2}$ ). (b) The Faradaic efficiency of  $\text{Sb}_2\text{Se}_3/\text{In}_2\text{S}_3\text{-2}/\text{MoS}_x$  photocathode for HER. Hydrogen evolution detected by gas chromatography and the charge passed during the photolysis of  $\text{Sb}_2\text{Se}_3/\text{In}_2\text{S}_3\text{-2}/\text{MoS}_x$  photocathode at an applied potential of 0.19 V vs RHE.

To measure the amount of hydrogen produced by the photoelectrochemical process, chronopotentiometry measurements were recorded in a sealed quartz cell (0.1 M  $\text{H}_2\text{SO}_4$ , as electrolyte,  $\text{Sb}_2\text{Se}_3/\text{In}_2\text{S}_3\text{-2}/\text{MoS}_x$  as work electrode) at an applied potential of 0.19 V vs. RHE without iR compensation. Before chronopotentiometry measurement, the assembled quartz cell was degassed by argon for 40 min. 0.5 mL of gas was analyzed by gas chromatography (GC, Techcomp GC 7890T, Ar carrier gas, Thermo Conductivity Detector). The theoretical  $\text{H}_2$  evolution can be calculated by the amount of charge passed through electrodes. The red square is the experimental data and the black line is the theoretical value of hydrogen, the blue square is the corresponding Faradaic efficiency and the blue line is the average Faradaic Efficiency.

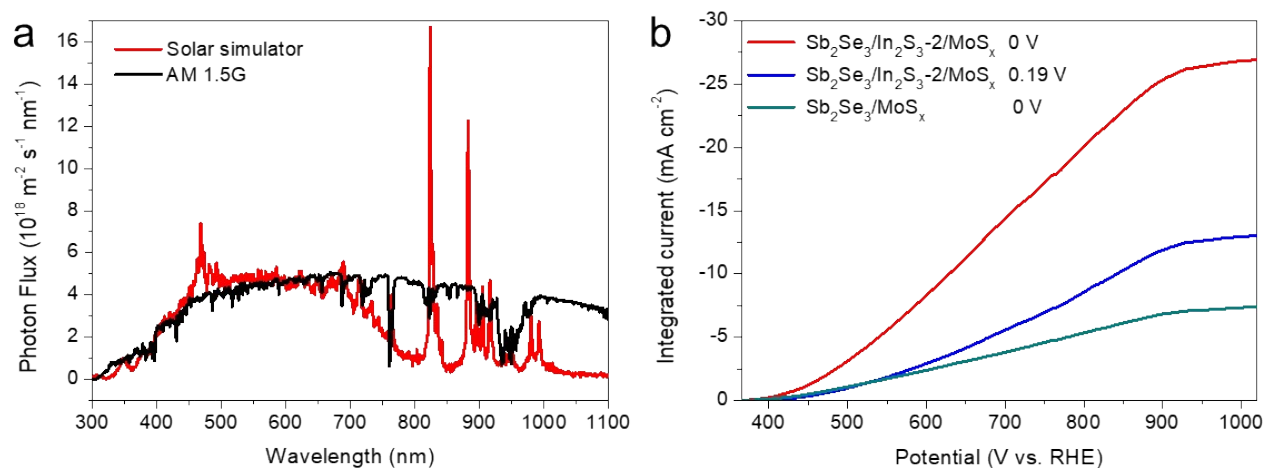

**Figure S15.** Properties of the solar simulator. (a) Solar irradiance of the AM 1.5G (ASTM G173-03) and the solar simulator. (b) The calculated photocurrents of  $\text{Sb}_2\text{Se}_3/\text{MoS}_x$  at 0 V vs RHE,  $\text{Sb}_2\text{Se}_3/\text{In}_2\text{S}_3/\text{MoS}_x$  at 0.19 V vs RHE and 0 V vs RHE by integrating IPCE over the photon flux of AM 1.5G (ASTM G173-03).

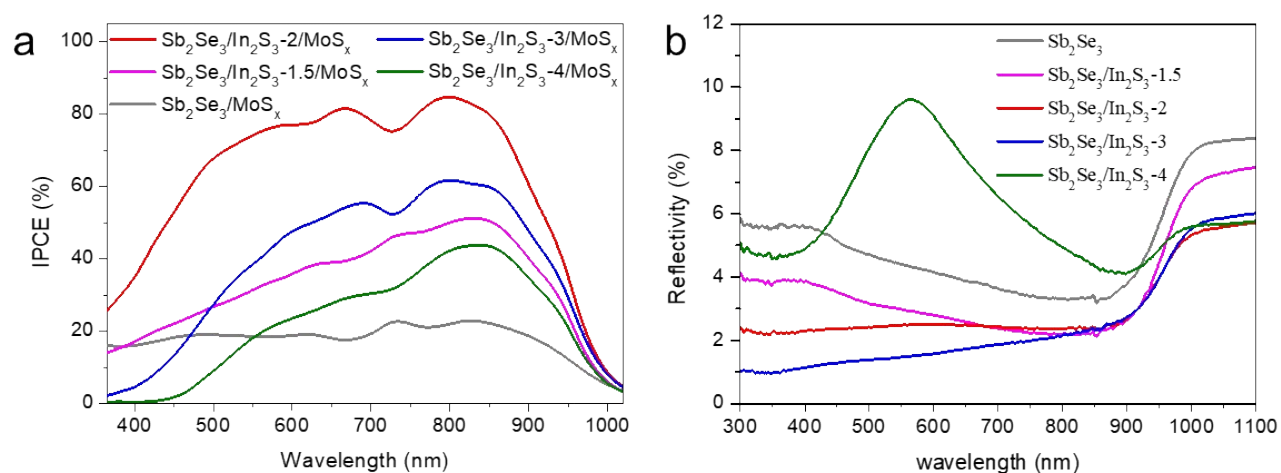

**Figure S16.** (a) Incident photon-to-current efficiencies (IPCE) of  $\text{Sb}_2\text{Se}_3/\text{MoS}_x$  and  $\text{Sb}_2\text{Se}_3/\text{In}_2\text{S}_3/\text{MoS}_x$  photocathodes at 0 V vs RHE. (b) Reflectance spectra of  $\text{Sb}_2\text{Se}_3$  and four different  $\text{Sb}_2\text{Se}_3/\text{In}_2\text{S}_3$  films measured by solid UV-Vis spectrometer.

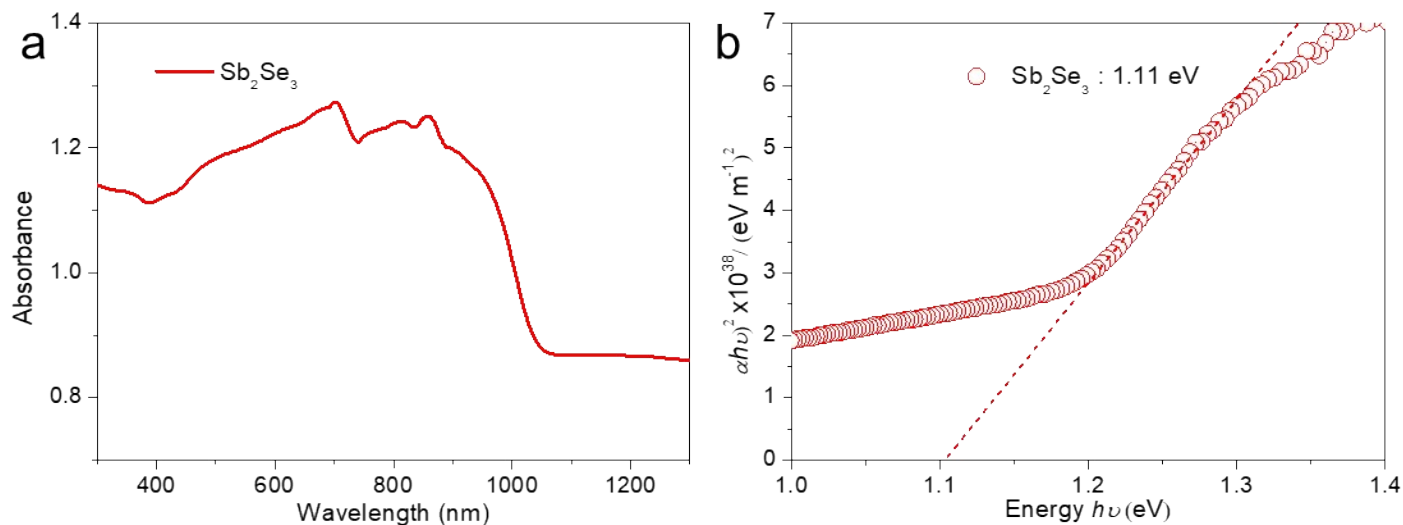

**Figure S17.** (a) Absorbance spectrum and (b) Tauc plot of  $\text{Sb}_2\text{Se}_3$  reference thin film. The bandgap of  $\text{Sb}_2\text{Se}_3$  is determined to be 1.11 eV.

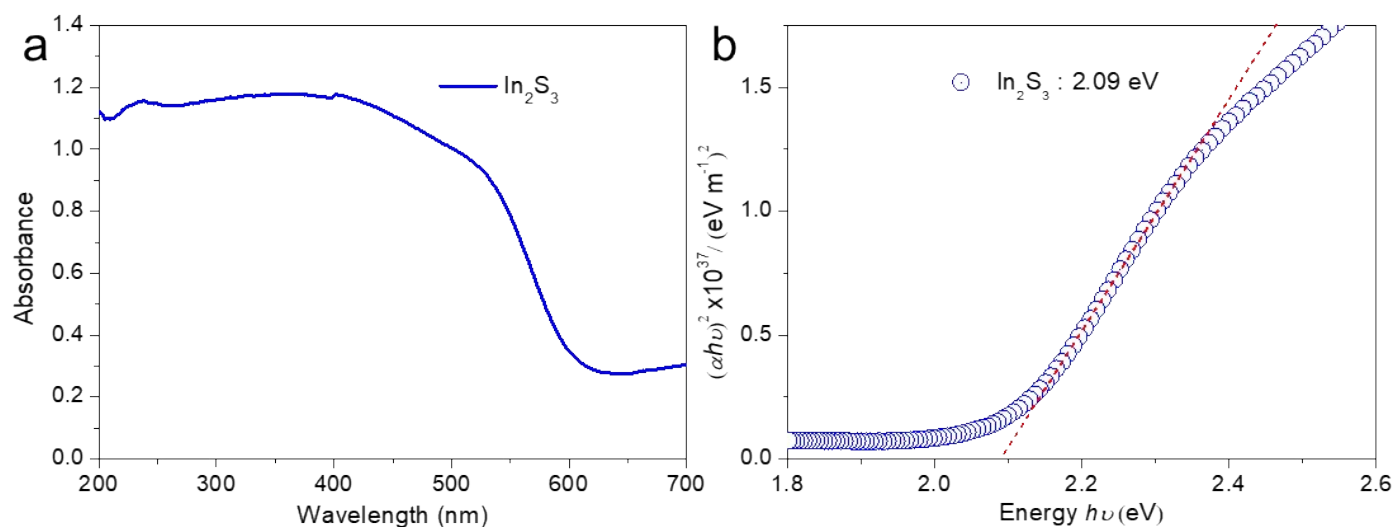

**Figure S18.** (a) Absorbance spectrum and (b) Tauc plot of  $\text{In}_2\text{S}_3$  reference thin film (deposited on FTO). The bandgap of  $\text{In}_2\text{S}_3$  is determined to be 2.09 eV.

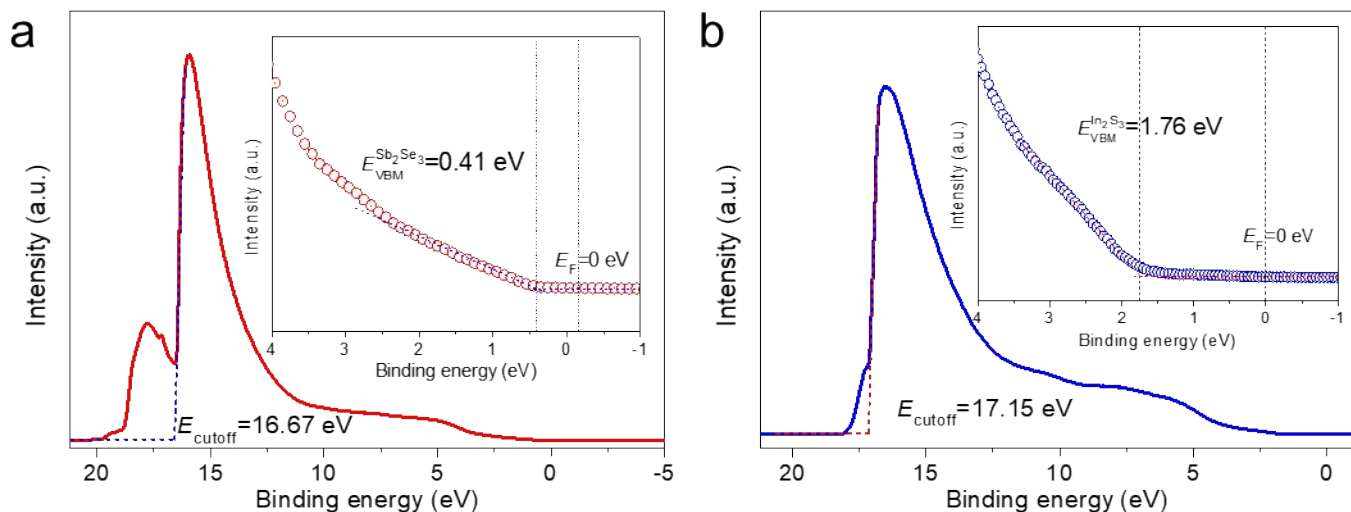

**Figure S19.** UPS spectra of the  $\text{Sb}_2\text{Se}_3$ ,  $\text{Sb}_2\text{Se}_3/\text{In}_2\text{S}_3$  for VB determination. The insert show the enlarged valence band position of  $\text{Sb}_2\text{Se}_3$  and  $\text{In}_2\text{S}_3$ , respectively.

The work function ( $E_{\text{work}}$  corresponding to the Fermi level), valence band (VB), and conduction band (CB) of  $\text{Sb}_2\text{Se}_3$  and  $\text{Sb}_2\text{Se}_3/\text{In}_2\text{S}_3$  were determined according to following equations.

$$E_{\text{work}} = h\nu - (E_{\text{cutoff}} - E_F) \quad \text{equation S1}$$

$$E_{\text{VB}} = E_{\text{work}} + E_{\text{VBM}} \quad \text{equation S2}$$

$$E_{\text{CB}} = E_{\text{VB}} - E_g \quad \text{equation S3}$$

Where, the  $E_{\text{cutoff}}$  is cut-off energy edge, the  $E_F$  is initial edge energy, the  $E_{\text{VBM}}$  is the energy from valence band maximum to Fermi level, the  $E_g$  is band gap energy (obtained by UV-vis spectra), the  $E_{\text{VB}}$  is valence band energy and the  $E_{\text{CB}}$  is conduction band energy.

For  $\text{Sb}_2\text{Se}_3$  electrode,

$$E_{\text{work}} = 21.2 - (16.67 - 0) = 4.53 \text{ eV}; \quad E_{\text{VB}} = 4.53 + 0.41 = 4.94 \text{ eV}; \quad \text{and} \quad E_{\text{CB}} = 4.94 - 1.11 = 3.83 \text{ eV}.$$

For the  $\text{Sb}_2\text{Se}_3/\text{In}_2\text{S}_3$  heterojunction,

$$E_{\text{work}} = 21.2 - (17.15 - 0) = 4.05 \text{ eV}; \quad E_{\text{VB}} = 4.05 + 1.76 = 5.81 \text{ eV}; \quad \text{and} \quad E_{\text{CB}} = 5.81 - 2.09 = 3.72 \text{ eV}.$$

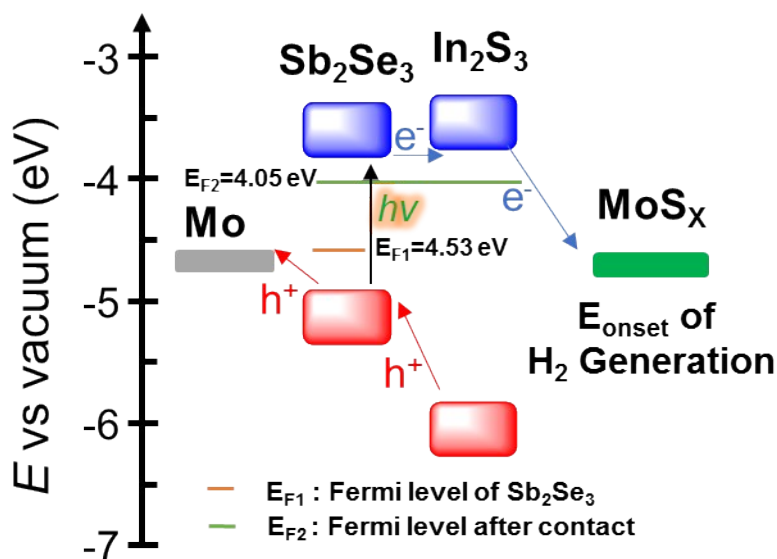

**Figure. S20** The band alignment diagram of the  $\text{Sb}_2\text{Se}_3/\text{In}_2\text{S}_3/\text{MoS}_x$  photocathode.

**Table S1.** Summary of PEC performance of recent published photocathodes.

| Device structure                                                                                   | Current density at 0 V vs RHE ( $\text{mA cm}^{-2}$ ) | Electrolyte                              | Onset Potential (V vs. RHE) | ABPE (%)   | Stability ( $\text{J}/\text{J}_0$ ); Time | Ref.             |
|----------------------------------------------------------------------------------------------------|-------------------------------------------------------|------------------------------------------|-----------------------------|------------|-------------------------------------------|------------------|
| <b>Mo/Sb<sub>2</sub>Se<sub>3</sub>/In<sub>2</sub>S<sub>3</sub>/TiO<sub>2</sub>/MoS<sub>x</sub></b> | <b>27</b>                                             | <b>0.1 M H<sub>2</sub>SO<sub>4</sub></b> | <b>0.39</b>                 | <b>2.6</b> | <b>100%; 1.5 h</b>                        | <b>This work</b> |
| FTO/Au/Sb <sub>2</sub> Se <sub>3</sub> /CdS/TiO <sub>2</sub> /Pt                                   | 20                                                    | pH 1 H <sub>2</sub> SO <sub>4</sub>      | 0.5                         | 3.40       | --                                        | 1                |
| FTO/Au/Sb <sub>2</sub> Se <sub>3</sub> /TiO <sub>2</sub> /RuO <sub>x</sub>                         | 30                                                    | pH 1 H <sub>2</sub> SO <sub>4</sub>      | 0.41                        | 2.33       | --                                        | 1                |
| FTO/Au/bilayer Sb <sub>2</sub> Se <sub>3</sub> /TiO <sub>2</sub> /C <sub>60</sub> /Pt              | 30                                                    | pH 1 H <sub>2</sub> SO <sub>4</sub>      | 0.32                        | --         | ~100%; 10 h                               | 2                |
| Mo/Sb <sub>2</sub> Se <sub>3</sub> /TiO <sub>2</sub> /Pt                                           | 20.2                                                  | 1 M H <sub>2</sub> SO <sub>4</sub>       | 0.57                        | 1.36       | 85%; 10 h                                 | 3                |
| FTO/Cu:NiO <sub>x</sub> /Sb <sub>2</sub> Se <sub>3</sub> /TiO <sub>2</sub> /Pt                     | 17.5                                                  | pH 1 H <sub>2</sub> SO <sub>4</sub>      | 0.34                        | --         | 75%; 4 h                                  | 4                |
| FTO/Au/Sb <sub>2</sub> Se <sub>3</sub> /TiO <sub>2</sub> /C <sub>60</sub> /Pt                      | 17                                                    | pH 1 H <sub>2</sub> SO <sub>4</sub>      | 0.55                        | --         | 98%; 10 h                                 | 5                |
| FTO/Au/Sb <sub>2</sub> Se <sub>3</sub> /TiO <sub>2</sub> /MoS <sub>x</sub>                         | 14                                                    | 1 M H <sub>2</sub> SO <sub>4</sub>       | 0.2                         | --         | 70%; 2 h                                  | 6                |
| FTO/Au/Sb <sub>2</sub> Se <sub>3</sub> /CdS/TiO <sub>2</sub> /Pt                                   | 13.5                                                  | pH 1 H <sub>2</sub> SO <sub>4</sub>      | 0.47                        | --         | 73%; 3 h                                  | 7                |
| n+p-Si/Al <sub>2</sub> O <sub>3</sub> /MoS <sub>2</sub>                                            | 34.5                                                  | pH 0.3 H <sub>2</sub> SO <sub>4</sub>    | 0.35                        | ~2         | ~100%; 40 h                               | 8                |
| n+p-Si/MoS <sub>2</sub>                                                                            | 17.5                                                  | 1 M H <sub>2</sub> SO <sub>4</sub>       | 0.4                         | ~2         | ~100%; 100 h                              | 9                |
| n+p-Si/Ti-TiO <sub>x</sub> /MoS <sub>x</sub>                                                       | 16                                                    | 1 M HClO <sub>4</sub>                    | 0.33                        | --         | 75%; 10 h                                 | 10               |
| FTO/Au/Cu <sub>2</sub> O/TiO <sub>2</sub> /MoS <sub>2+x</sub>                                      | 6.3                                                   | 1 M KOH                                  | ~0.5                        | --         | ~100%; 10 h                               | 11               |
| FTO/Au/Cu <sub>2</sub> O/AZO/TiO <sub>2</sub> /MoS <sub>x</sub>                                    | 5.7                                                   | pH 1 H <sub>2</sub> SO <sub>4</sub>      | 0.46                        | --         | ~17%; 7 h                                 | 12               |
| GaAs/GaInP <sub>2</sub> /TiO <sub>2</sub> /g-MoS <sub>x</sub>                                      | 8.5                                                   | 1 M H <sub>2</sub> SO <sub>4</sub>       | 0.2                         | --         | 80%; 20 h                                 | 13               |
| Au/InP/Ti/MoS <sub>x</sub>                                                                         | 15.8                                                  | 1 M HClO <sub>4</sub>                    | 0.62                        | --         | ~100%; 2 h                                | 14               |

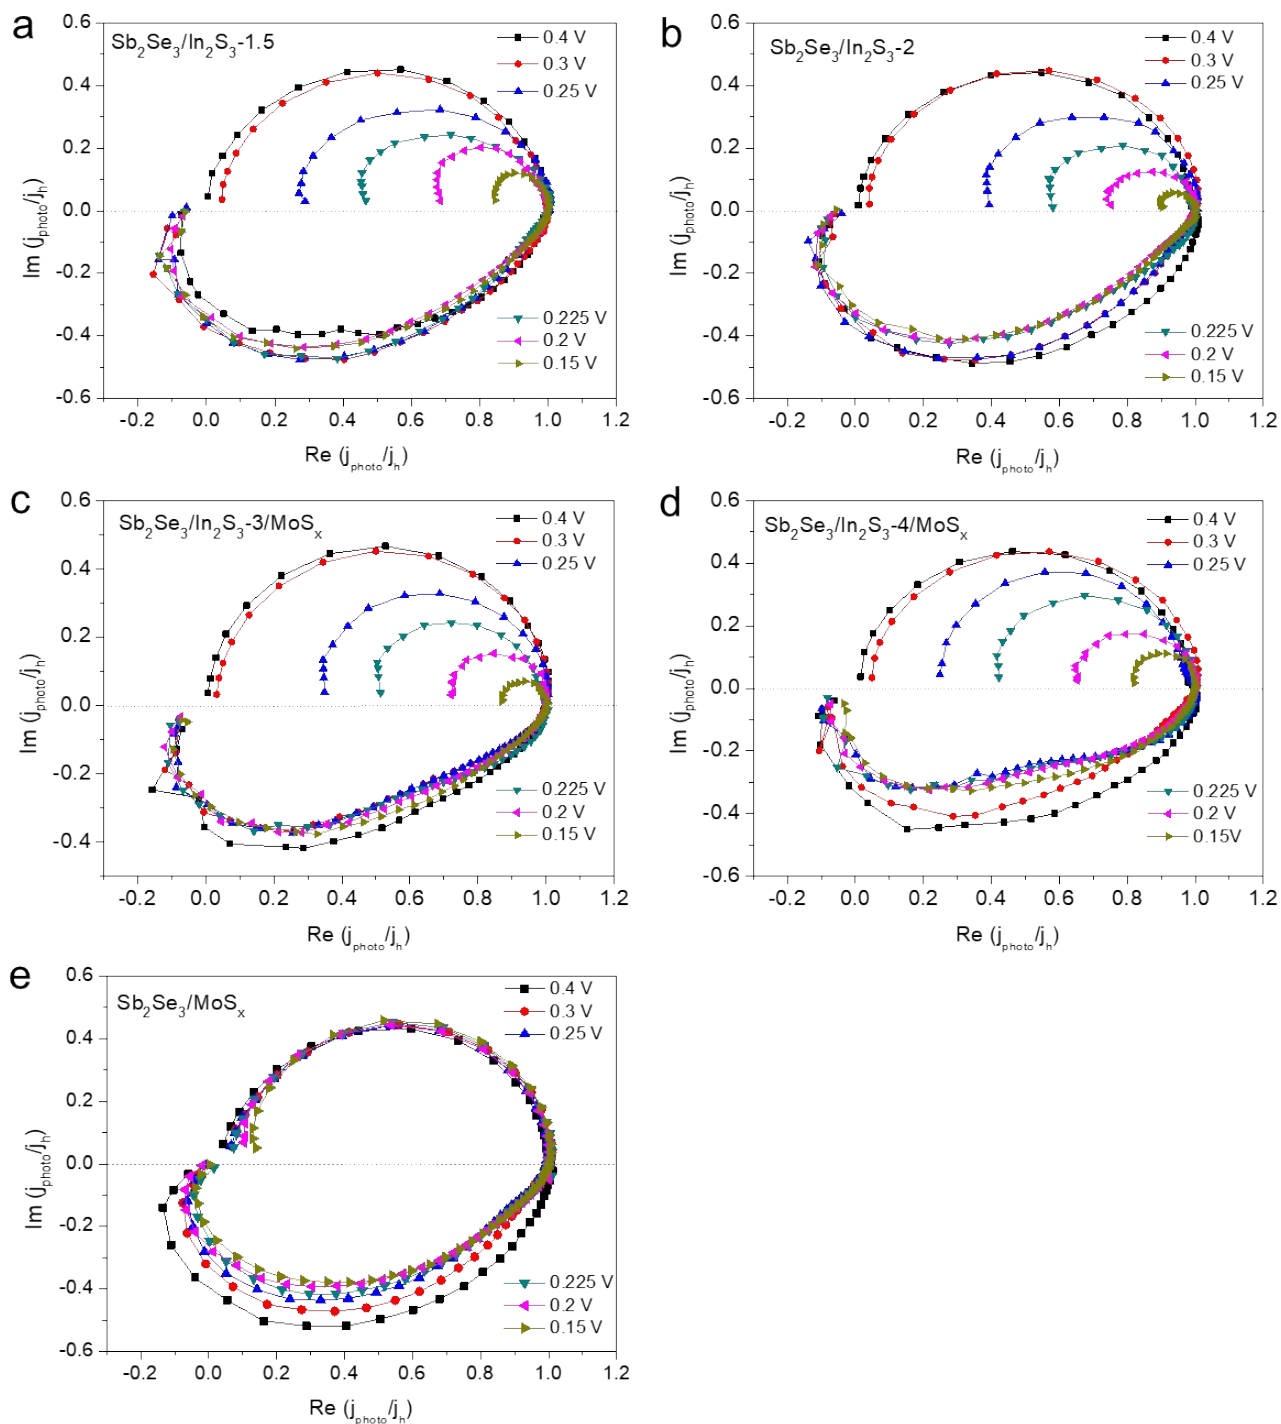

**Figure S21.** IMPS spectra of  $\text{Sb}_2\text{Se}_3/\text{MoS}_x$  and  $\text{Sb}_2\text{Se}_3/\text{In}_2\text{S}_3/\text{MoS}_x$  photocathodes at various potential.

**Table S2.** The values of resistances and capacitances in fitted EC.

| Device Structure                                                                      | $R_s$<br>( $\Omega$ ) | $R_{bulk}$<br>( $\Omega$ ) | $C_{bulk}$<br>(F) | $R_{ct}$<br>( $\Omega$ ) | $C_H$<br>(F) |
|---------------------------------------------------------------------------------------|-----------------------|----------------------------|-------------------|--------------------------|--------------|
| Sb <sub>2</sub> Se <sub>3</sub> /MoS <sub>x</sub>                                     | 14.4                  | 31.6                       | 1.19 $\mu$        | 22.4                     | 1.34m        |
| Sb <sub>2</sub> Se <sub>3</sub> /In <sub>2</sub> S <sub>3</sub> -1.5/MoS <sub>x</sub> | 15.6                  | 29.2                       | 3.24 $\mu$        | 7.66                     | 2.37m        |
| Sb <sub>2</sub> Se <sub>3</sub> /In <sub>2</sub> S <sub>3</sub> -2/MoS <sub>x</sub>   | 11.8                  | 17.4                       | 4.48 $\mu$        | 6.42                     | 5.73m        |
| Sb <sub>2</sub> Se <sub>3</sub> /In <sub>2</sub> S <sub>3</sub> -3/MoS <sub>x</sub>   | 10.57                 | 21.3                       | 3.61 $\mu$        | 6.95                     | 5.11m        |
| Sb <sub>2</sub> Se <sub>3</sub> /In <sub>2</sub> S <sub>3</sub> -4/MoS <sub>x</sub>   | 12.0                  | 45.7                       | 1.05 $\mu$        | 9.20                     | 1.61m        |

## References

- (1) Yang, W.; Kim, J. H.; Hutter, O. S.; Phillips, L. J.; Tan, J.; Park, J.; Lee, H.; Major, J. D.; Lee, J. S.; Moon, J. Benchmark Performance of Low-Cost Sb<sub>2</sub>Se<sub>3</sub> Photocathodes for Unassisted Solar Overall Water Splitting. *Nat. Commun.* **2020**, *11*, 861.
- (2) Park, J.; Yang, W.; Tan, J.; Lee, H.; Yun, J. W.; Shim, S. G.; Park, Y. S.; Moon, J. Hierarchical Nanorod-Derived Bilayer Strategy to Enhance the Photocurrent Density of Sb<sub>2</sub>Se<sub>3</sub> Photocathodes for Photoelectrochemical Water Splitting. *ACS Energy Lett.* **2020**, *5*, 136-145.
- (3) Zhou, H.; Feng, M.; Song, K.; Liao, B.; Wang, Y.; Liu, R.; Gong, X.; Zhang, D.; Cao, L.; Chen, S. A Highly [001]-Textured Sb<sub>2</sub>Se<sub>3</sub> Photocathode for Efficient Photoelectrochemical Water Reduction. *Nanoscale* **2019**, *11*, 22871-22879.
- (4) Lee, H.; Yang, W.; Tan, J.; Oh, Y.; Park, J.; Moon, J. Cu-Doped NiO<sub>x</sub> as an Effective Hole-Selective Layer for a High-Performance Sb<sub>2</sub>Se<sub>3</sub> Photocathode for Photoelectrochemical Water Splitting. *ACS Energy Lett.* **2019**, *4*, 995-1003.
- (5) Tan, J.; Yang, W.; Oh, Y.; Lee, H.; Park, J.; Boppella, R.; Kim, J.; Moon, J. Fullerene as a Photoelectron Transfer Promoter Enabling Stable TiO<sub>2</sub>-Protected Sb<sub>2</sub>Se<sub>3</sub> Photocathodes for Photo-Electrochemical Water Splitting. *Adv. Energy Mater.* **2019**, *9*, 1900179.
- (6) Prabhakar, R. R.; Septina, W.; Siol, S.; Moehl, T.; Wick-Joliat, R.; Tilley, S. D. Photocorrosion-Resistant Sb<sub>2</sub>Se<sub>3</sub> Photocathodes with Earth Abundant MoS<sub>x</sub> Hydrogen Evolution Catalyst. *J. Mater. Chem. A* **2017**, *5*, 23139-23145.
- (7) Park, J.; Yang, W.; Oh, Y.; Tan, J.; Lee, H.; Boppella, R.; Moon, J. Efficient Solar-to-Hydrogen Conversion from Neutral Electrolytes Using Morphology-Controlled Sb<sub>2</sub>Se<sub>3</sub> Light Absorbers. *ACS Energy Lett.* **2019**, *4*, 517-526.
- (8) Zhou, J.; Dai, S.; Dong, W.; Su, X.; Fang, L.; Zheng, F.; Wang, X.; Shen, M. Efficient and Stable MoS<sub>2</sub> Catalyst Integrated on Si Photocathodes by Photoreduction and Post-Annealing for Water Splitting. *Appl. Phys. Lett.* **2016**, *108*, 213905.
- (9) Benck, J. D.; Lee, S. C.; Fong, K. D.; Kibsgaard, J.; Sinclair, R.; Jaramillo, T. F. Designing Active and Stable



Silicon Photocathodes for Solar Hydrogen Production Using Molybdenum Sulfide Nanomaterials. *Adv. Energy Mater.* **2014**, *4*, 1400739.

(10) Seger, B.; Laursen, A. B.; Vesborg, P. C. K.; Pedersen, T.; Hansen, O.; Dahl, S.; Chorkendorff, I. Hydrogen Production Using a Molybdenum Sulfide Catalyst on a Titanium-Protected n<sup>+</sup>p-Silicon Photocathode. *Angew. Chem. Int. Ed.* **2012**, *51*, 9128-9131.

(11) Morales-Guio, C. G.; Liardet, L.; Mayer, M. T.; Tilley, S. D.; Grätzel, M.; Hu, X. Photoelectrochemical Hydrogen Production in Alkaline Solutions Using Cu<sub>2</sub>O Coated with Earth-Abundant Hydrogen Evolution Catalysts. *Angew. Chem. Int. Ed.* **2015**, *54*, 664-667.

(12) Morales-Guio, C. G.; Tilley, S. D.; Vrubel, H.; Grätzel, M.; Hu, X. Hydrogen Evolution from a Copper(I) Oxide Photocathode Coated with an Amorphous Molybdenum Sulphide Catalyst. *Nat. Commun.* **2014**, *5*, 3059.

(13) Gu, J.; Aguiar, J. A.; Ferrere, S.; Steirer, K. X.; Yan, Y.; Xiao, C.; Young, James L.; Al-Jassim, M.; Neale, N. R.; Turner, J. A. A Graded Catalytic–Protective Layer for an Efficient and Stable Water-Splitting Photocathode. *Nat. Energy* **2017**, *2*, 16192.

(14) Li, Q.; Zheng, M.; Zhong, M.; Ma, L.; Wang, F.; Ma, L.; Shen, W. Engineering MoS<sub>x</sub>/Ti/InP Hybrid Photocathode for Improved Solar Hydrogen Production. *Sci. Rep.* **2016**, *6*, 29738.
